# Supplementary material
Source: PubMed Central journal article supplement (PMC4428045)
Supplement: embr0016-0654-sd8.pdf [file embr0016-0654-sd8.pdf]

**Table S4. Gene Expression Related to VEGF Signaling in differentiated *iEr71* ES cells with DOX added from D2-3.5.**

| Type of Gene                                                           | Fold Difference (+DOX/-DOX)                              |                                                          |                    |                                           |                    |                     |
|------------------------------------------------------------------------|----------------------------------------------------------|----------------------------------------------------------|--------------------|-------------------------------------------|--------------------|---------------------|
|                                                                        | 0.1-0.5                                                  | 0.5-1.0                                                  | 1.0-1.5            | 1.5-5                                     | 5-10               | >10                 |
| <b>Vascular Endothelial &amp; Other Growth Factors &amp; Receptors</b> | Figf<br>Hif1a                                            | Pdgfc<br>Vegfa<br>Vegfb<br>Vegfc                         | Nrp2               | Flt1                                      | Flt4<br>Kdr        | Nrp1<br>Pgf<br>Nos3 |
| <b>Small G-Protein Signaling</b>                                       | Hras1<br>Kras<br>Nras<br>Raf1<br>Src                     | Shc2                                                     | Rac1               | Rac2<br>Sh2d2a                            |                    | Grb2                |
| <b>Akt &amp; PI3-Kinase Signaling</b>                                  | Akt1<br>Akt2<br>Pik3ca<br>Pik3r2                         | Pik3cb<br>Pik3cd<br>Pik3cg<br>Pik3r1<br>Pik3r3<br>Pik3r5 |                    |                                           |                    | Akt3                |
| <b>Heat Shock Proteins</b>                                             | Hspb1                                                    |                                                          |                    | Hsp90aa1                                  |                    |                     |
| <b>Nfat Signaling</b>                                                  | Nfatc2<br>Nfatc3<br>Nfatc4                               | Nfat5                                                    | Nfatc1             |                                           |                    |                     |
| <b>MAP Kinase Signaling</b>                                            | Map2k1<br>Map2k2<br>Mapk1<br>Mapk3<br>Mapk14<br>Mapkapk3 |                                                          | Mapk12<br>Mapkapk2 | Mapk11<br>Mapk13                          |                    |                     |
| <b>Phospholipase A2 &amp; C</b>                                        | Pla2g12a<br>Pla2g4b<br>Pla2g6<br>Plcg1                   | Pla2g10<br>Pla2g3<br>Plcg2                               | Pla2g2e<br>Pla2g5  | Pla2g12b<br>Pla2g1b<br>Pla2g2f<br>Pla2g4a | Pla2g2a<br>Pla2g2d |                     |
| <b>Protein Kinase C</b>                                                | Prkca<br>Prkcc                                           | Prkcb                                                    |                    |                                           |                    |                     |
| <b>Protein Phosphatases</b>                                            | Ppp3cb                                                   | Ppp3r1                                                   | Ppp3cc             | Ppp3ca                                    |                    | Ppp3r2              |
| <b>Apoptosis &amp; Cell Cycle</b>                                      | Casp9<br>Cdc42                                           | Bad                                                      |                    |                                           |                    |                     |
| <b>Cell Motility, Migration, &amp; Morphology</b>                      | Ptgs2                                                    | Ptk2<br>Pxn                                              |                    |                                           |                    |                     |
