# Supplementary material
Source: PubMed Central journal article supplement (PMC4428045)
Supplement: embr0016-0654-sd9.pdf [file embr0016-0654-sd9.pdf]

**Table S5. Gene expression related to Cell motility in differentiated *iEr71* ES cells with DOX added from D2-3.5.**

| Type of Gene                          | Fold Difference (+DOX/-DOX) |                                      |                                                                                               |                                                                                                                                      |                              |      |
|---------------------------------------|-----------------------------|--------------------------------------|-----------------------------------------------------------------------------------------------|--------------------------------------------------------------------------------------------------------------------------------------|------------------------------|------|
|                                       | 0.1-0.5                     | 0.5-1.0                              | 1.0-1.5                                                                                       | 1.5-5                                                                                                                                | 5-10                         | >10  |
| <b>Growth Factors &amp; Receptors</b> |                             | Csf1<br>Egfr<br>Igf1r<br>Met<br>uPAR | Tgfb1                                                                                         | Egf<br>Fgf2                                                                                                                          | Hgf                          | Igf1 |
| <b>Rho Family GTPase</b>              | Rnd3<br>Ezrin/ERM           | Vim<br>Wasf1                         | Actr2<br>Arhgdia<br>Limk1<br>Plcg1<br>Pten<br>Ptpn1<br>Rhoa<br>Rock1<br>Rac1<br>Wasl<br>Cdc42 | Actr3<br>Rho<br>Rhoc<br>Rhogef7<br>Msn<br>Myk<br>Pi3k, alpha<br>Baiap2<br>Rac2<br>Stat3<br>Wipf1<br>Protein Kinase C, alpha<br>Wasf2 |                              |      |
| <b>Adhesion</b>                       |                             | Vinculin<br>Cav1                     | Vasp<br>Enah<br>Capn1                                                                         | Rasa<br>Paxillin<br>Talin1<br>Mmp14                                                                                                  | Dipeptidyl-peptidase4        |      |
| <b>Integrin-Mediated Signaling</b>    |                             |                                      | Integrin-linked kinase1<br>Itgb1                                                              | Itga4<br>Itgb2<br>Itgb3<br>Myh9<br>Ptk2                                                                                              |                              |      |
| <b>Cellular Projections</b>           |                             |                                      | Rdx<br>Arf6<br>Ctnn                                                                           | Svil<br>Rho<br>Rhoc<br>Rhogef7<br>Msn<br>Myh9                                                                                        |                              | Fap  |
| <b>Cell Polarity</b>                  | Ezrin/ERM                   | Csf1<br>Igf1r                        | Cdc42<br>Integrin-linked kinase1                                                              |                                                                                                                                      |                              |      |
| <b>Proteolysis</b>                    |                             | Capn2<br>uPAR                        | Capn1<br>Mmp2<br>Timp2                                                                        | Akt1<br>Mmp9<br>Mmp14<br>Myh9                                                                                                        | Dipeptidyl-peptidase4<br>Hgf | Fap  |
