# Supplementary material
Source: PubMed Central journal article supplement (PMC4428045)
Supplement: embr0016-0654-sd10.pdf [file embr0016-0654-sd10.pdf]

**Table S6. List of Primer sequences for real-time qPCR.**

| <b>Gene</b>      | <b>Forward sequence 5' to 3'</b> | <b>Reverse sequence 5' to 3'</b> |
|------------------|----------------------------------|----------------------------------|
| <i>Gja4</i>      | GAGATAAAGGCACGAAGGGAC            | CCCGTTGTAGGTGGGACAC              |
| <i>Gja5</i>      | GGTCCACAAGCACTCCACAG             | CTGAATGGTATCGCACCGGAA            |
| <i>Scl</i>       | CAGCCTGATGCTAAGGCAAG             | AGCCAACCTACCATGCACAC             |
| <i>Gata1</i>     | ATGGAATCCAGACGAGGAAC             | CTCCCCACAATTCCCCTACTAC           |
| <i>Arhgap18</i>  | TCGGGAGTTGTGCTAACTGC             | GGCCATATCTGCGACTGGAG             |
| <i>Arhgap25</i>  | AACCCCGAAGAAGCTGGGA              | CCTGAGGAACTTAACCCACTCC           |
| <i>Arhgap27</i>  | CCCCAACCACTGTCTACATCC            | CAACTGTTTGCCTAAGGCTGT            |
| <i>Er71/Etv2</i> | CTGGGAGCGGAATTTGGTTTC            | GTAAAGCGGGGTTCCAGTCC             |
| <i>Fli1</i>      | ATGGACGGGACTATTAAGGAGG           | GAAGCAGTCATATCTGCCTTGG           |
| <i>Erg</i>       | ACCTCACCCCTCAGTCCAAA             | TGGTCGGTCCCAGGATCTG              |
| <i>Elk3</i>      | TCCTCACGCGGTAGAGATCAG            | GTGGAGGTA CTGTTGCGG              |
| <i>Ets1</i>      | ACAGACTACTTTCCGATCAAGCA          | ACGCTCTCAAAGAGTCCTGG             |
| <i>Ets2</i>      | CCTGTGCGCCAACAGTTTTCG            | TGGAGTGTCTGATCTTCACTGA           |
| <i>Tel/Etv6</i>  | AGCAGGAACGAATTTCATAACAG          | GGCAGGTGGATCGAGTCTTC             |
| <i>Actb</i>      | GGCTGTATTCCCCTCCATCG             | CCAGTTGGTAACAATGCCATGT           |
| <i>gapdh</i>     | AGGTCGGTGTGAACGGATTTG            | TGTAGACCATGTAGTTGAGGTCA          |
