# Supplementary material
Source: PubMed Central journal article supplement (PMC4428045)

# Figure S1

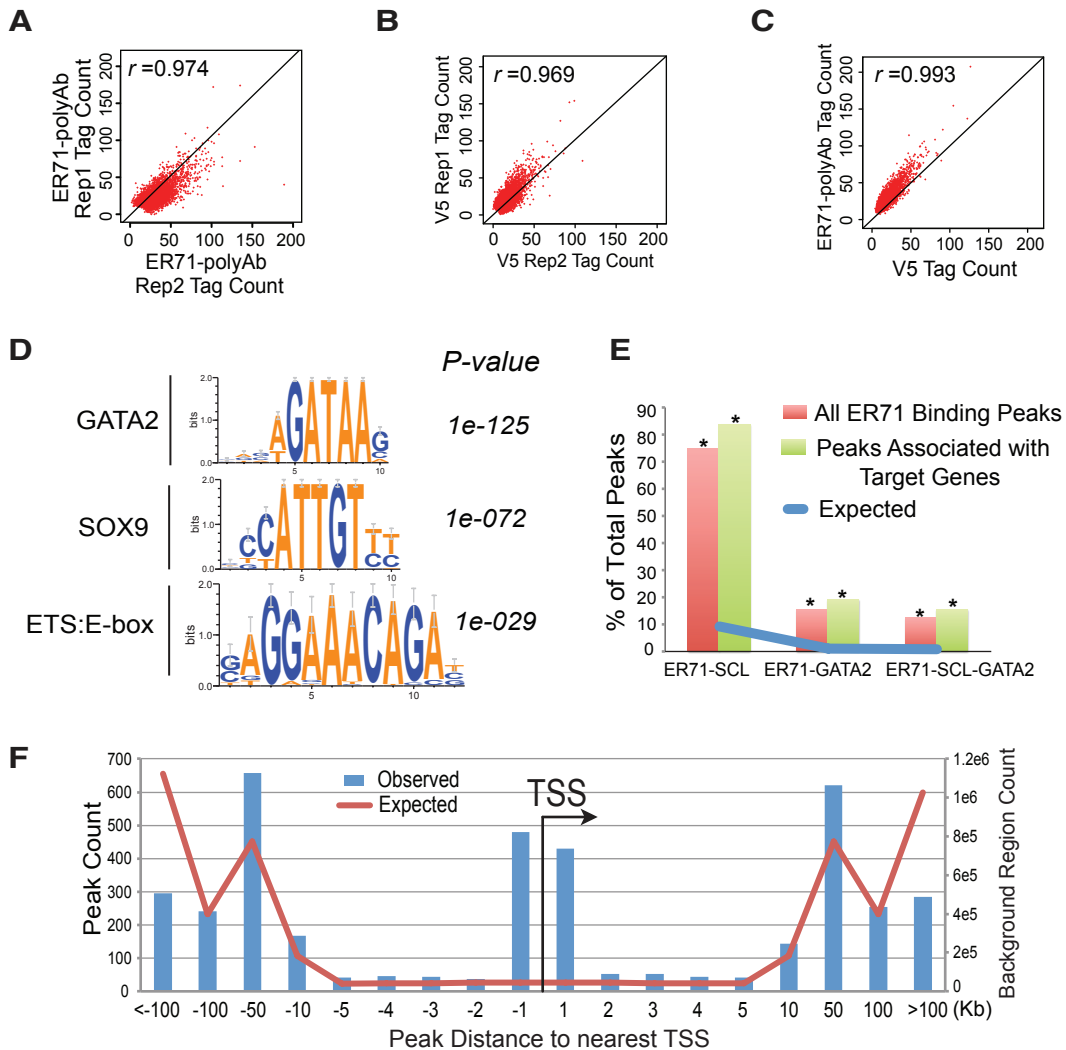

Supplement: embr0016-0654-sd1.pdf [file embr0016-0654-sd1.pdf]

Figure S2

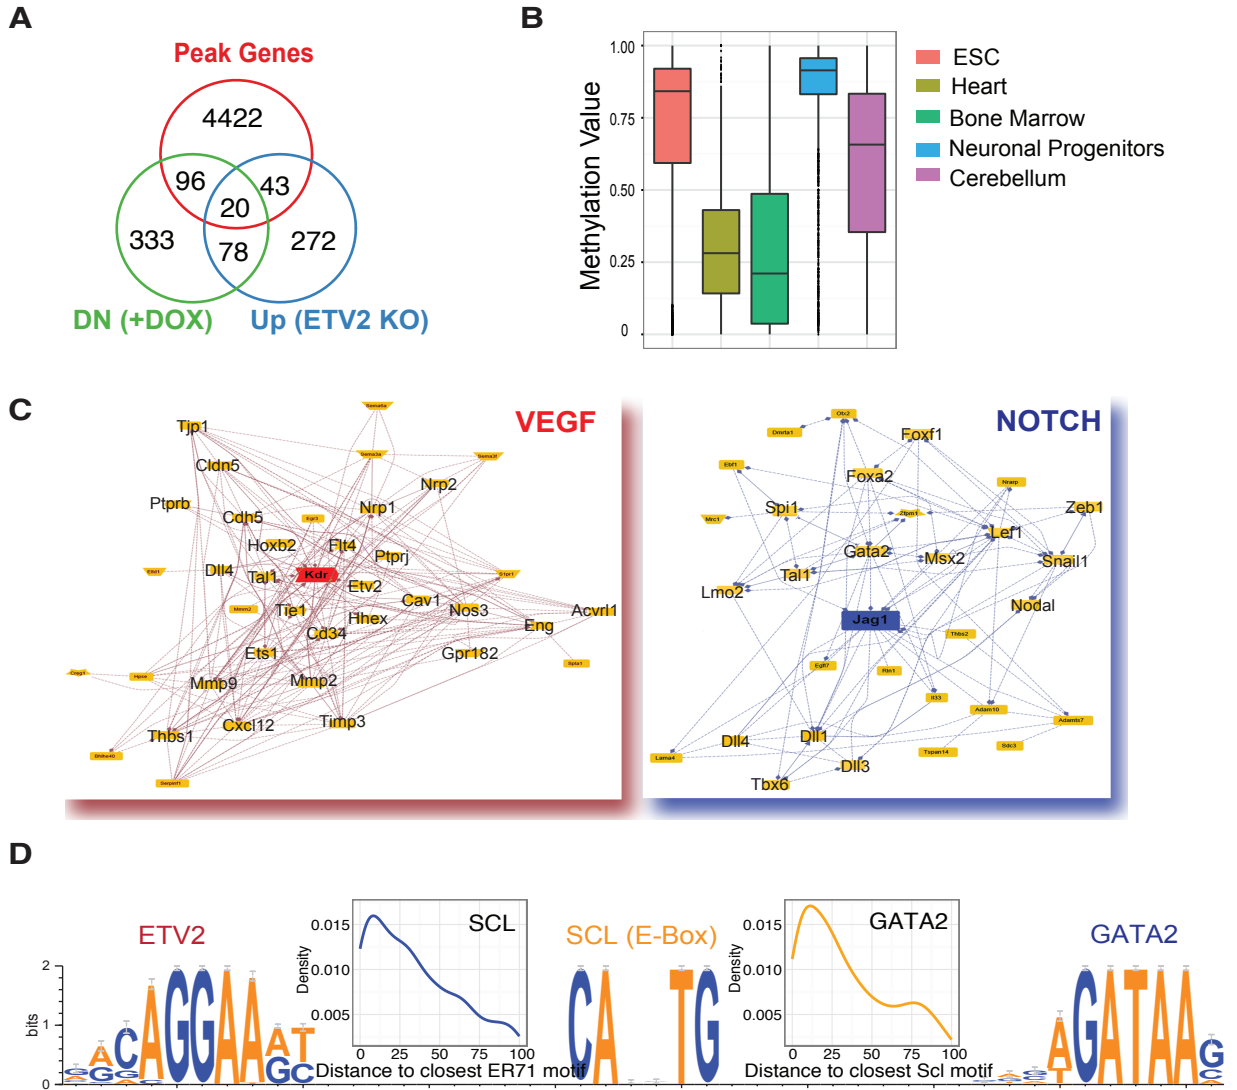

Supplement: embr0016-0654-sd2.pdf [file embr0016-0654-sd2.pdf]

Figure S3

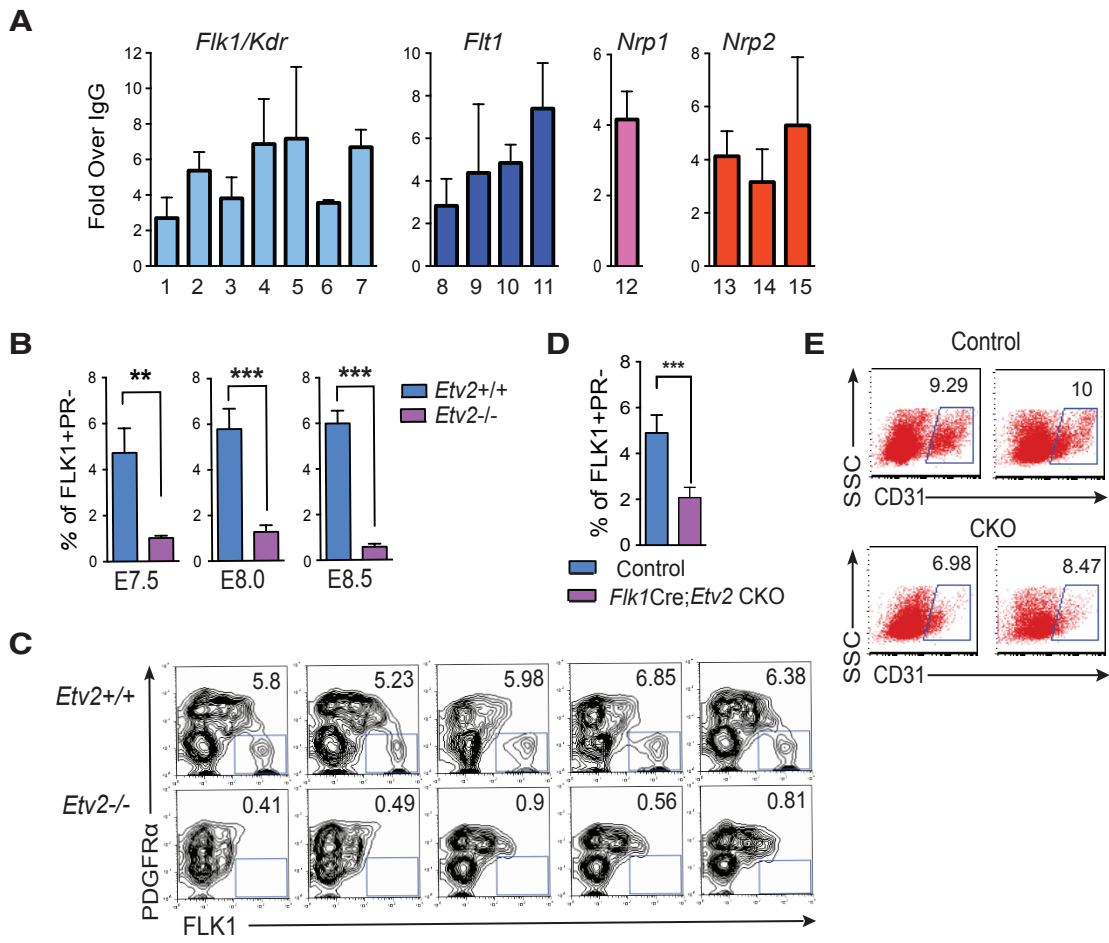

Supplement: embr0016-0654-sd3.pdf [file embr0016-0654-sd3.pdf]

**A**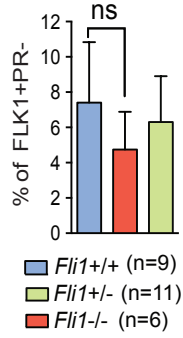**B**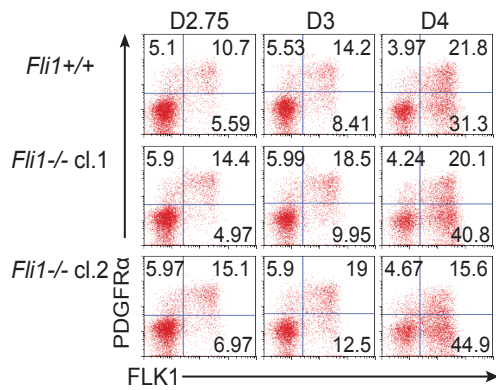**D**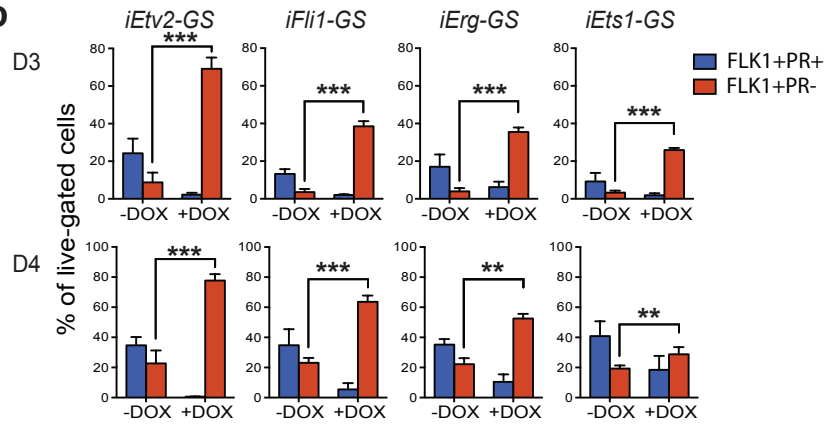**C**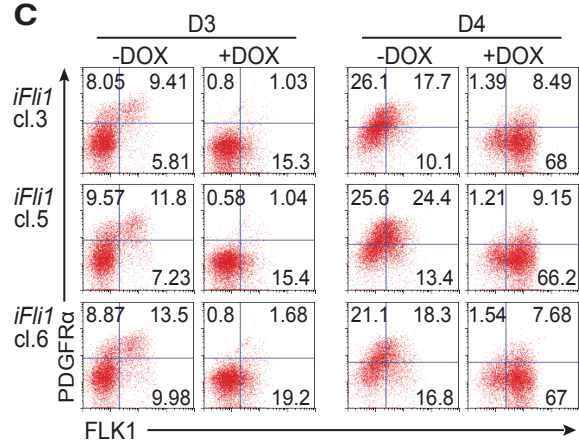

Supplement: embr0016-0654-sd4.pdf [file embr0016-0654-sd4.pdf]
